# Supplementary material
Source: PubMed Central journal article supplement (PMC3186844)
Supplement: NIHMS314158-supplement-1.pdf [file NIHMS314158-supplement-1.pdf]

## Supplementary Figure legends

**Figure S1. The majority of CD4<sup>+</sup>CD25<sup>+</sup> T cells are Foxp3<sup>+</sup> before and after irradiation.**

Representative FACS patterns of intracellular staining of Foxp3 among CD4<sup>+</sup>CD25<sup>+</sup> gated splenocytes in untreated and 24 hrs after TBI 1,000 cGy wild type C57BL/6 mice. The data are representative of two independent experiments.

**Figure S2. Effect of graded doses of irradiation on different T cell subsets in wild type mice.**

Gated TCR $\alpha\beta$ <sup>+</sup> spleen cells in untreated mice and 24 hours after TBI in wild type C57BL/6 mice were analyzed for CD4 versus CD8, NK1.1 versus TCR $\alpha\beta$  and CD44 versus TCR $\alpha\beta$ . CD4<sup>+</sup> TCR $\alpha\beta$ <sup>+</sup> spleen cells were stained for CD4 versus CD25 also. The data are representative of three independent experiments

**Figure S3. Marked increase of CD44 expression in CD4<sup>+</sup> CD25<sup>+</sup> T cells that survive after TBI.**

Splenocytes were harvested from untreated wild type mice or from mice 24 hours after 1,000 cGy TBI. Left panels show CD4 versus CD25 on gated TCR $\alpha\beta$ <sup>+</sup> cells; right panels show CD44 expression amongst gated CD4<sup>+</sup> CD25<sup>+</sup> T cells. The data are representative of three independent experiments.

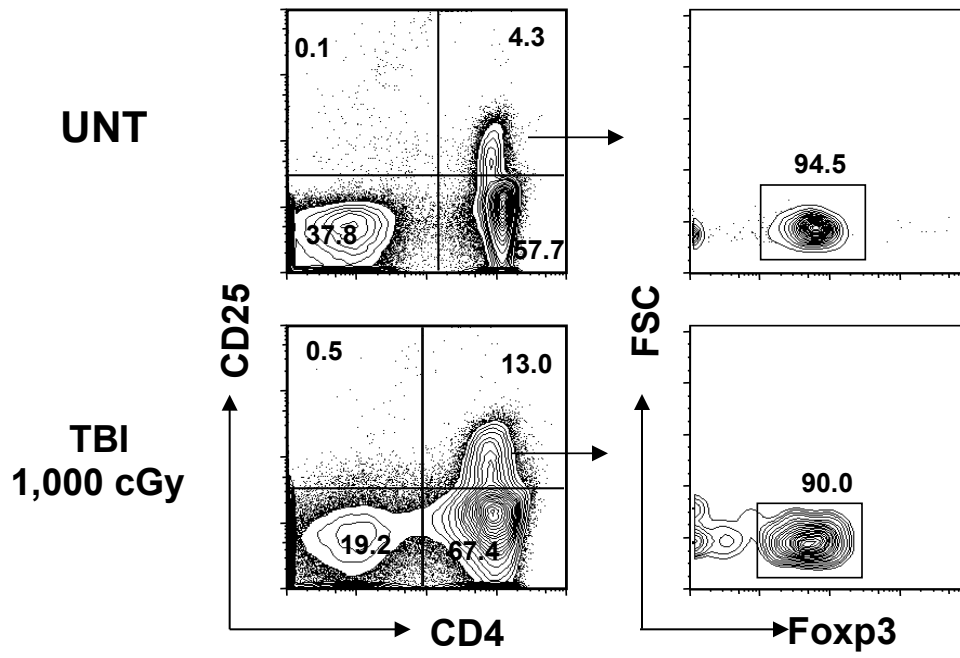

Figure S1

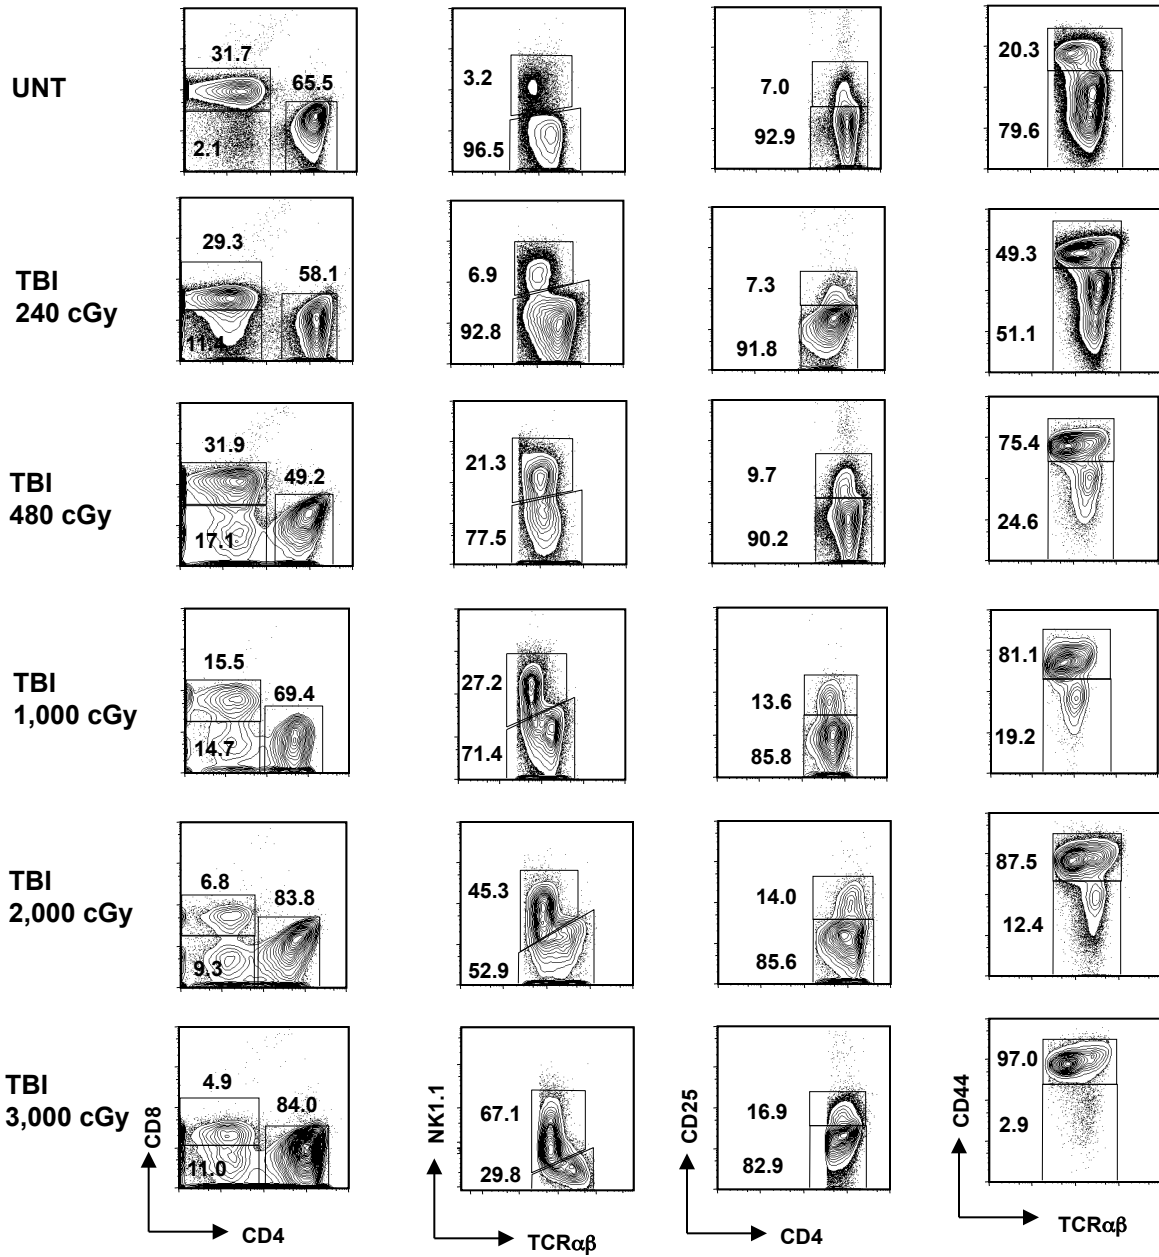

Figure S2

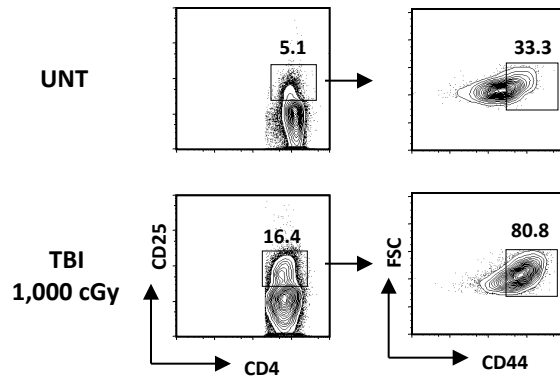

Figure S3
